# Supplementary material for: Preparation and characterization of a composite hydrogel with graphene oxide as an acid catalyst
Source: Royal Society of Chemistry journal article supplement (doi:10.1039/c5sm00142k), 2015-01-01
Supplement: c5sm00142k1.pdf [file c5sm00142k1.pdf]

**Electronic supplementary information**

**Preparation and characterization of a composite hydrogel with graphene oxide as an acid catalyst**

Ting Jiang,<sup>†</sup> Zhu-Yin Sui,<sup>‡</sup> Quan-Sheng Yang,<sup>‡</sup> Xue-Tong Zhang,<sup>\*,†</sup> Bao-Hang Han<sup>\*,‡</sup>

*<sup>†</sup> College of Materials Science and Engineering, Beijing Institute of Technology, Beijing 100081, China*

*<sup>‡</sup> National Center for Nanoscience and Technology, Beijing 100190, China*

Tel: +86 10 8254 5576. E-mail: [hanbh@nanoctr.cn](mailto:hanbh@nanoctr.cn).

Tel: +86 10 6891 8591. E-mail: [zhangxtchina@yahoo.com](mailto:zhangxtchina@yahoo.com).

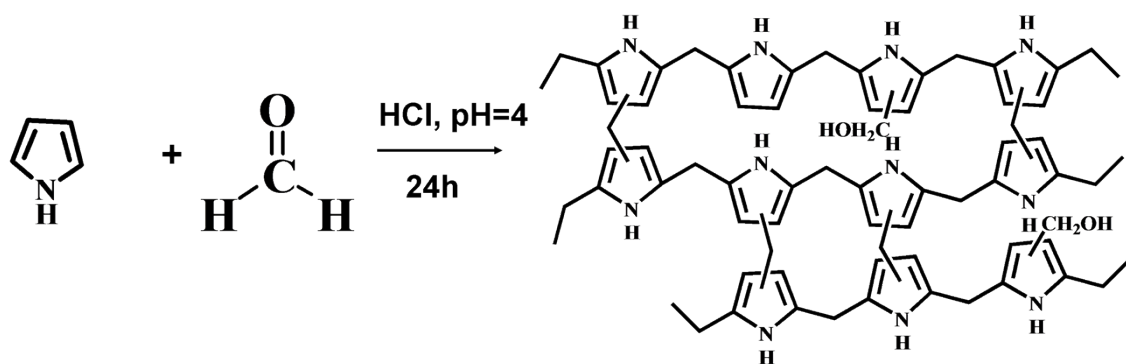

**Fig. S1** Formation mechanism of PF.

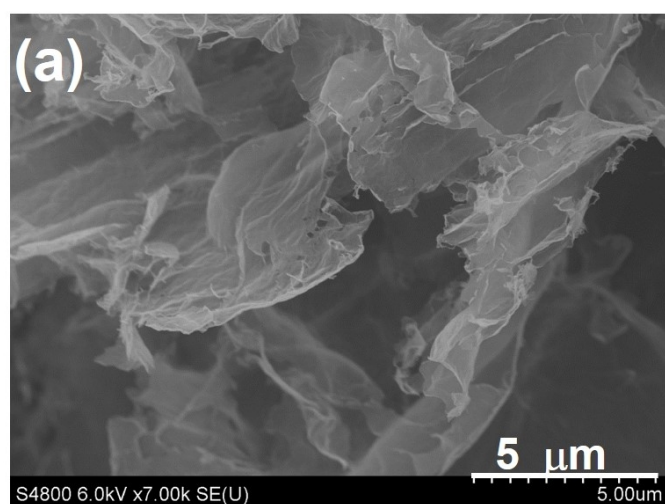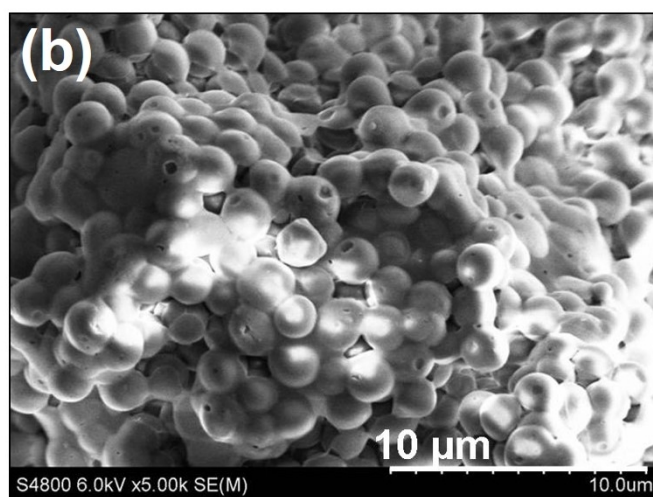

**Fig. S2** SEM image of GO (a) and PF (b).

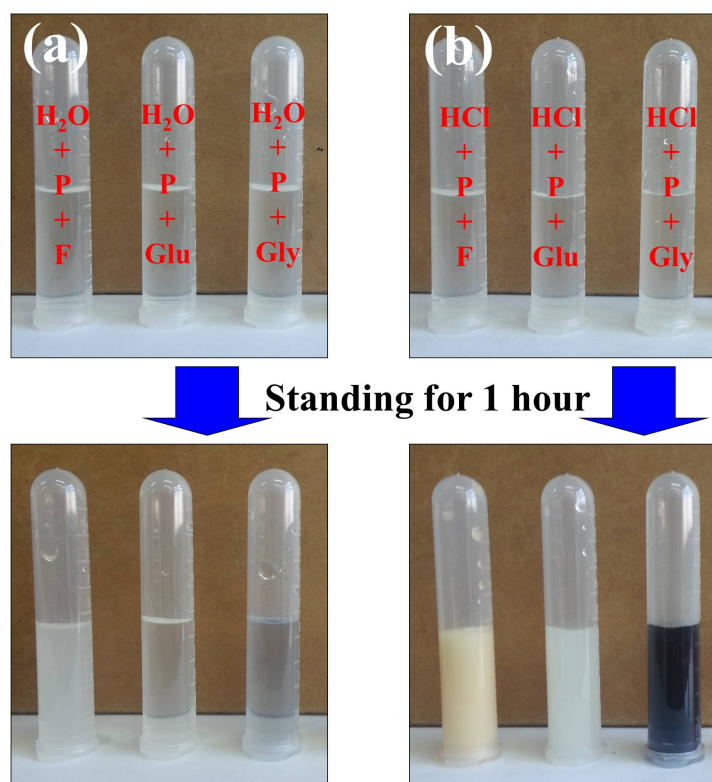

**Fig. S3** Comparison of polymerization process of pyrrole and three different aldehydes in (a) water and (b) HCl (pH=4).

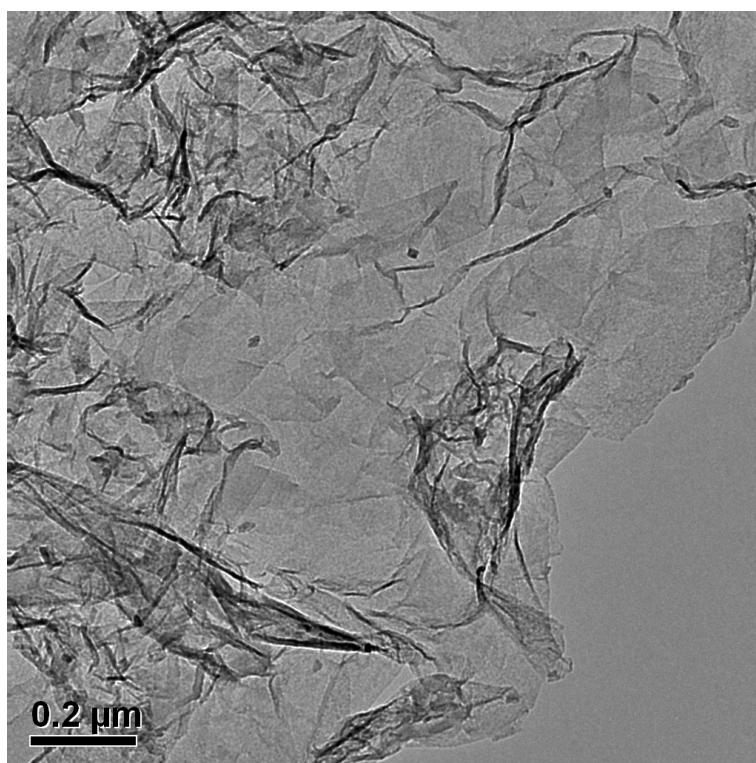

**Fig. S4** TEM image of GOP-1.

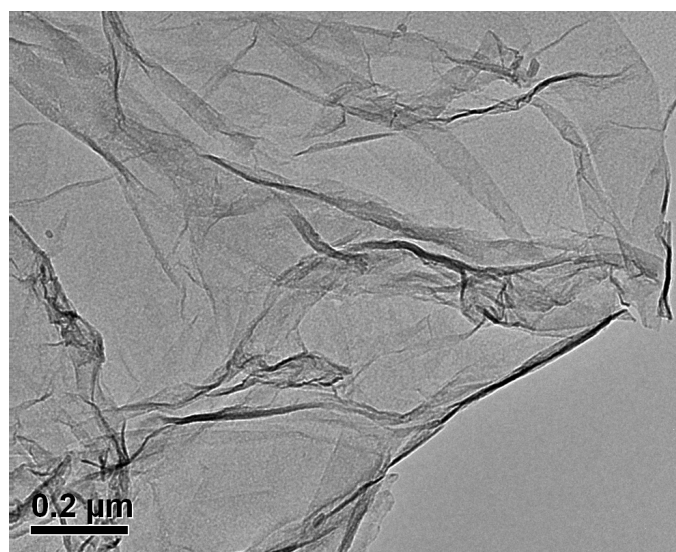

**Fig. S5** TEM image of GO.

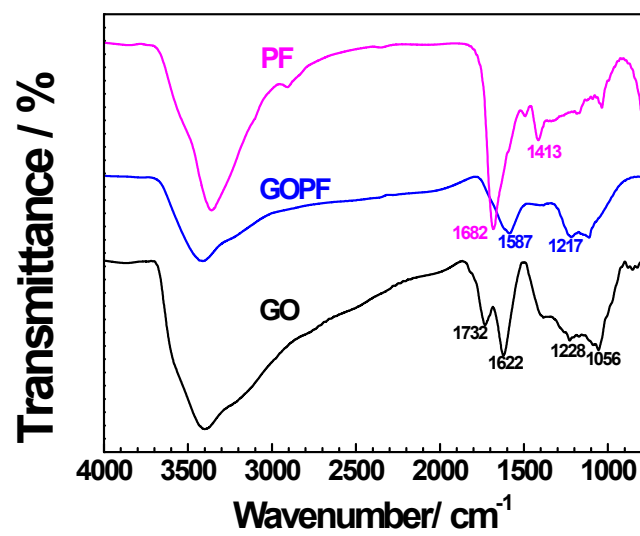

Fig. S6 IR spectra of GO, GOP-1, and PF.
